# Supplementary material for: Single-cell characterization of CRISPR-modified transcript isoforms with nanopore sequencing
Source: PubMed Central journal article supplement (PMC8647366; doi:10.1186/s13059-021-02554-1), 2021-12-06

## **SUPPLEMENTARY MATERIALS**

### **Single cell characterization of CRISPR-modified transcript isoforms with nanopore sequencing**

#### **Authors:**

Heon Seok Kim<sup>1</sup>, Susan M. Grimes<sup>1</sup>, Anna C. Hooker<sup>1</sup>, Billy T. Lau<sup>1</sup>, Hanlee P. Ji<sup>1</sup>

#### **Institutions:**

<sup>1</sup> Division of Oncology, Department of Medicine, Stanford University School of Medicine, Stanford, CA, United States

#### **Corresponding author:**

Hanlee P. Ji

Email: [genomics\\_ji@stanford.edu](mailto:genomics_ji@stanford.edu)

CCSR 1115, 269 Campus Drive, Stanford, CA-94305, USA

**Fig S1. Guide-RNA designs targeting splicing acceptor of *RACK1*.** Red and blue bases indicate protospacer adjacent motif (PAM) and splicing acceptor sites respectively.

CTTCTGTTTTACCTCCTTTAGATAAGACCATCATCATGTGGAAACTGACCAGGGATGAGACCAACTAT  
 GAAGACAAAATGGAGGAAATCTATTCTGGTAGTAGTACACCTTTGACTGGTCCCTACTCTGGTTGATA  
 Exon2

CAAACTCCTCCTCTCAGGGGCACCACCACGAGGCGATTTGTGGGC  
 GTTTGAGGAGGAGAGAGTCCCGTGGTGGTGCTCCGCTAAACACCCG  
 Exon3

TTCCTTTCCATCTTCTGTAGGATGAGAGCCACTCAGAGTGGGTGTCTTGTGTCCGCTTCTC  
 AAGGAAAGGTAGAAGACATCCTACTCTCGGTGAGTCTCACCCACAGAACACAGGCGAAGAG  
 Exon4

ACCGCACGTCTATGCAGGTATGGAACCTGGCTAACTGCAAGC  
 TGGCGTGACAGATACGTCATACCTTGGACCGATTGACGTTCCG  
 Exon5

TACCTTACCTGTGTCCAGGATGGCCAGGCCATGTTATGGGATCTCAA  
 ATGGAATGGACACAGGTCCTACCGGTCCGGTACAATACCCTAGAGTT  
 Exon6

TTTTGCCCTGTTCCCCAGGATTTAGAGGGAAAGATCATTGT  
 AAAACGGGACAAGGGGTCCTAAATCTCCCTTTCTAGTAACA  
 Exon7

**Fig S2. Distribution of edit distance between the cell barcode from each long-read sequence and the matched barcode from the cellranger whitelist. Reads with edit distance >3 (red line) are excluded from the analysis.**

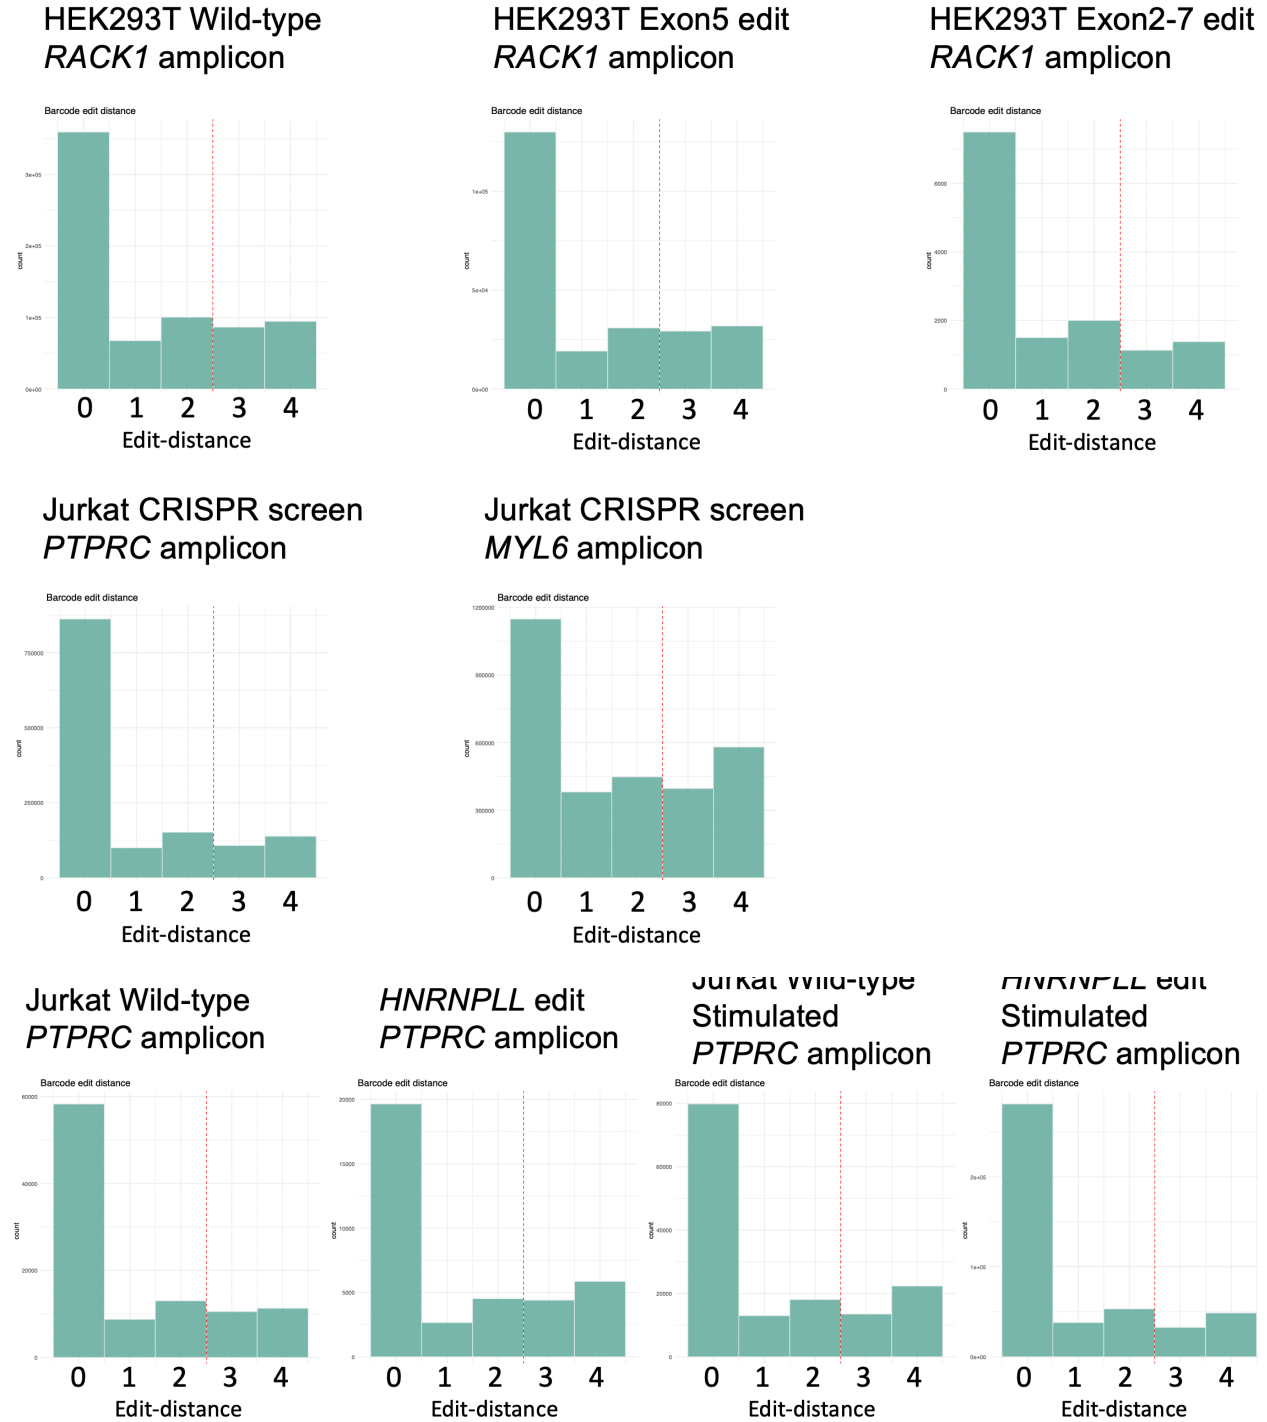

**Fig S3. UMI edit distance distribution for a representative sample of cells in the wild-type HEK293T sample.** Edit distance between all UMIs in each cell are shown. Cell barcode and read counts per cell are noted.

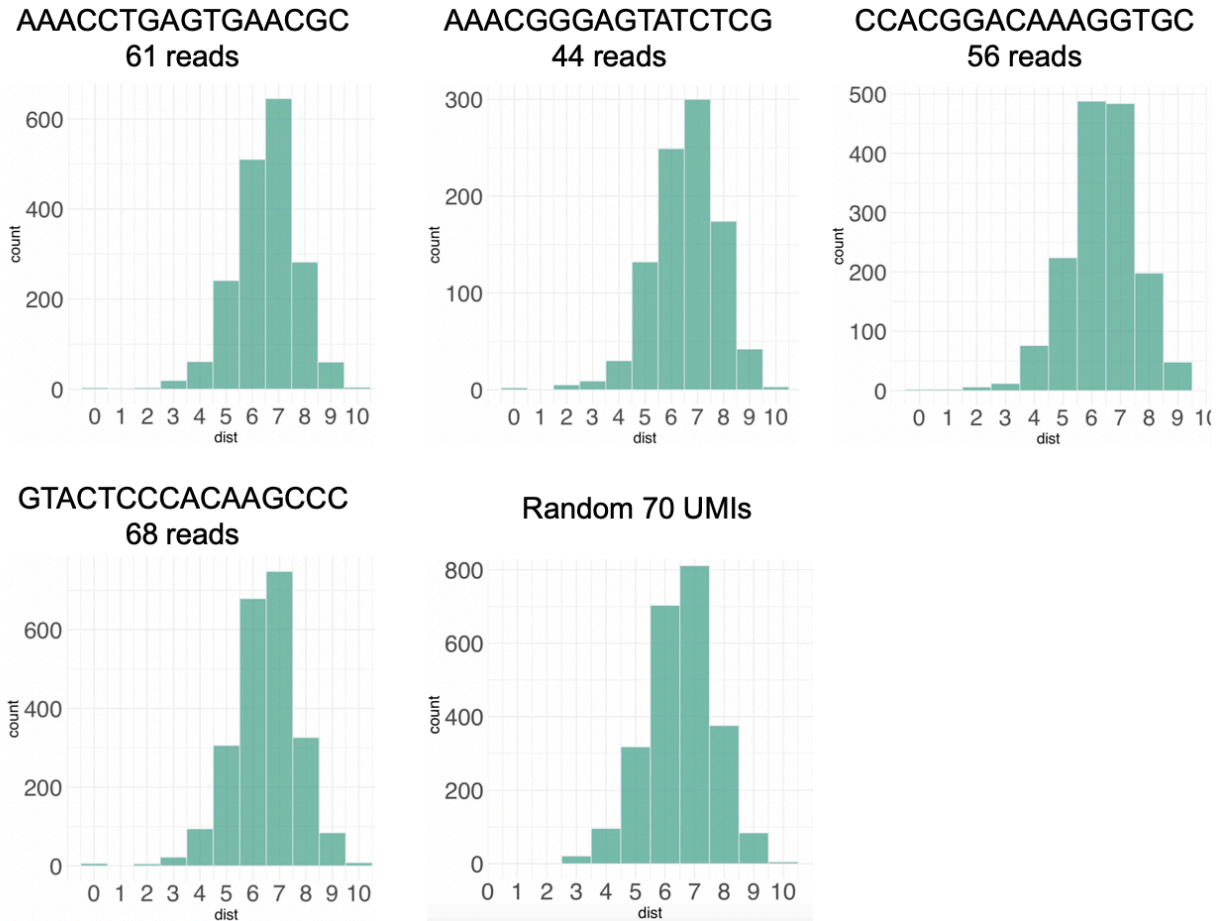

**Fig S4. *RACK1* transcript isoform composition of wild-type HEK293T cells.** Heatmap showing proportion of each transcript isoform (x-axis) with each cell (y-axis) and clustering based on a given mRNA transcript isoform proportion.

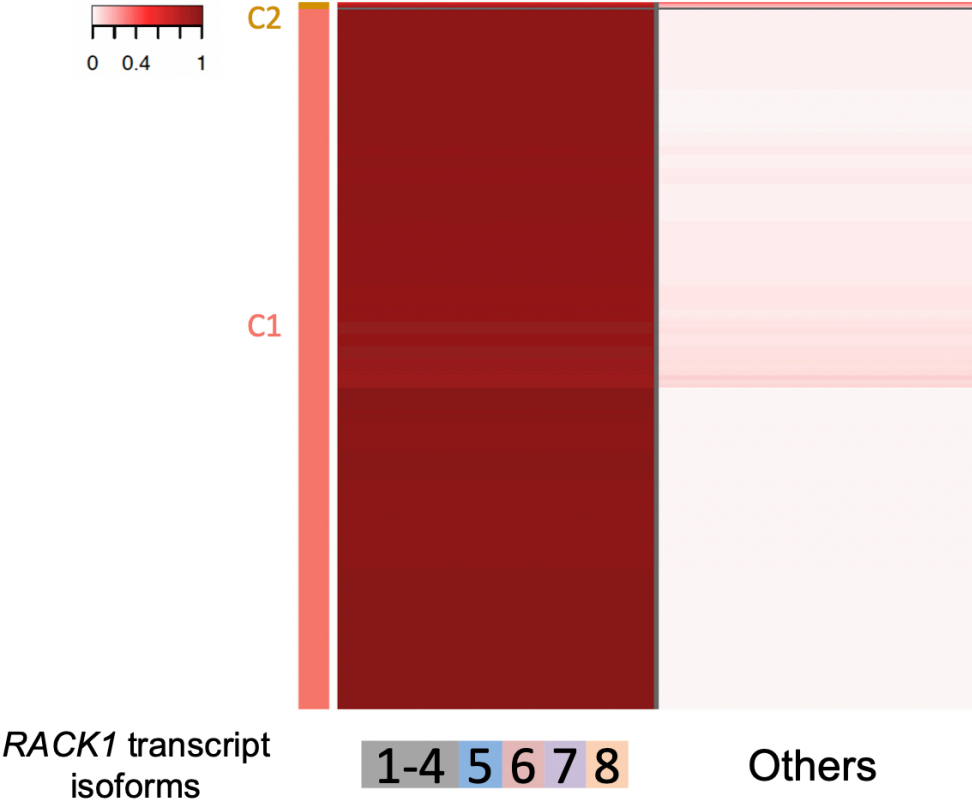

**Fig S5. Quantification of *RACK1* expression level for each cluster.** Violin plot showing the expression level of *RACK1* in each cluster. P values are calculated in comparison with cluster2. (two-sided t-test)

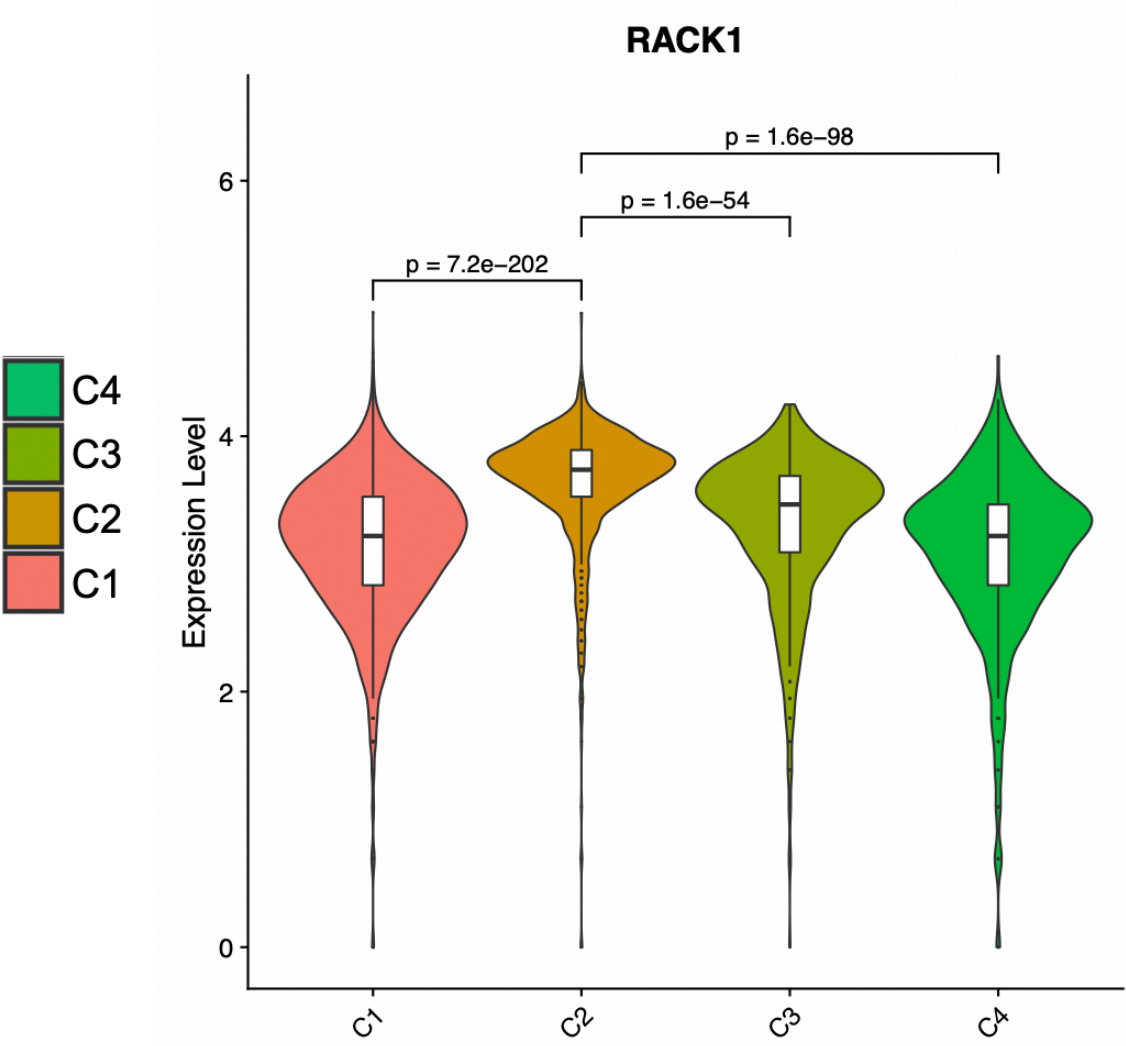

Fig S6. Volcano plot differentially expressed gene between cells with full-length or exon5 skipped RACK1 transcript.

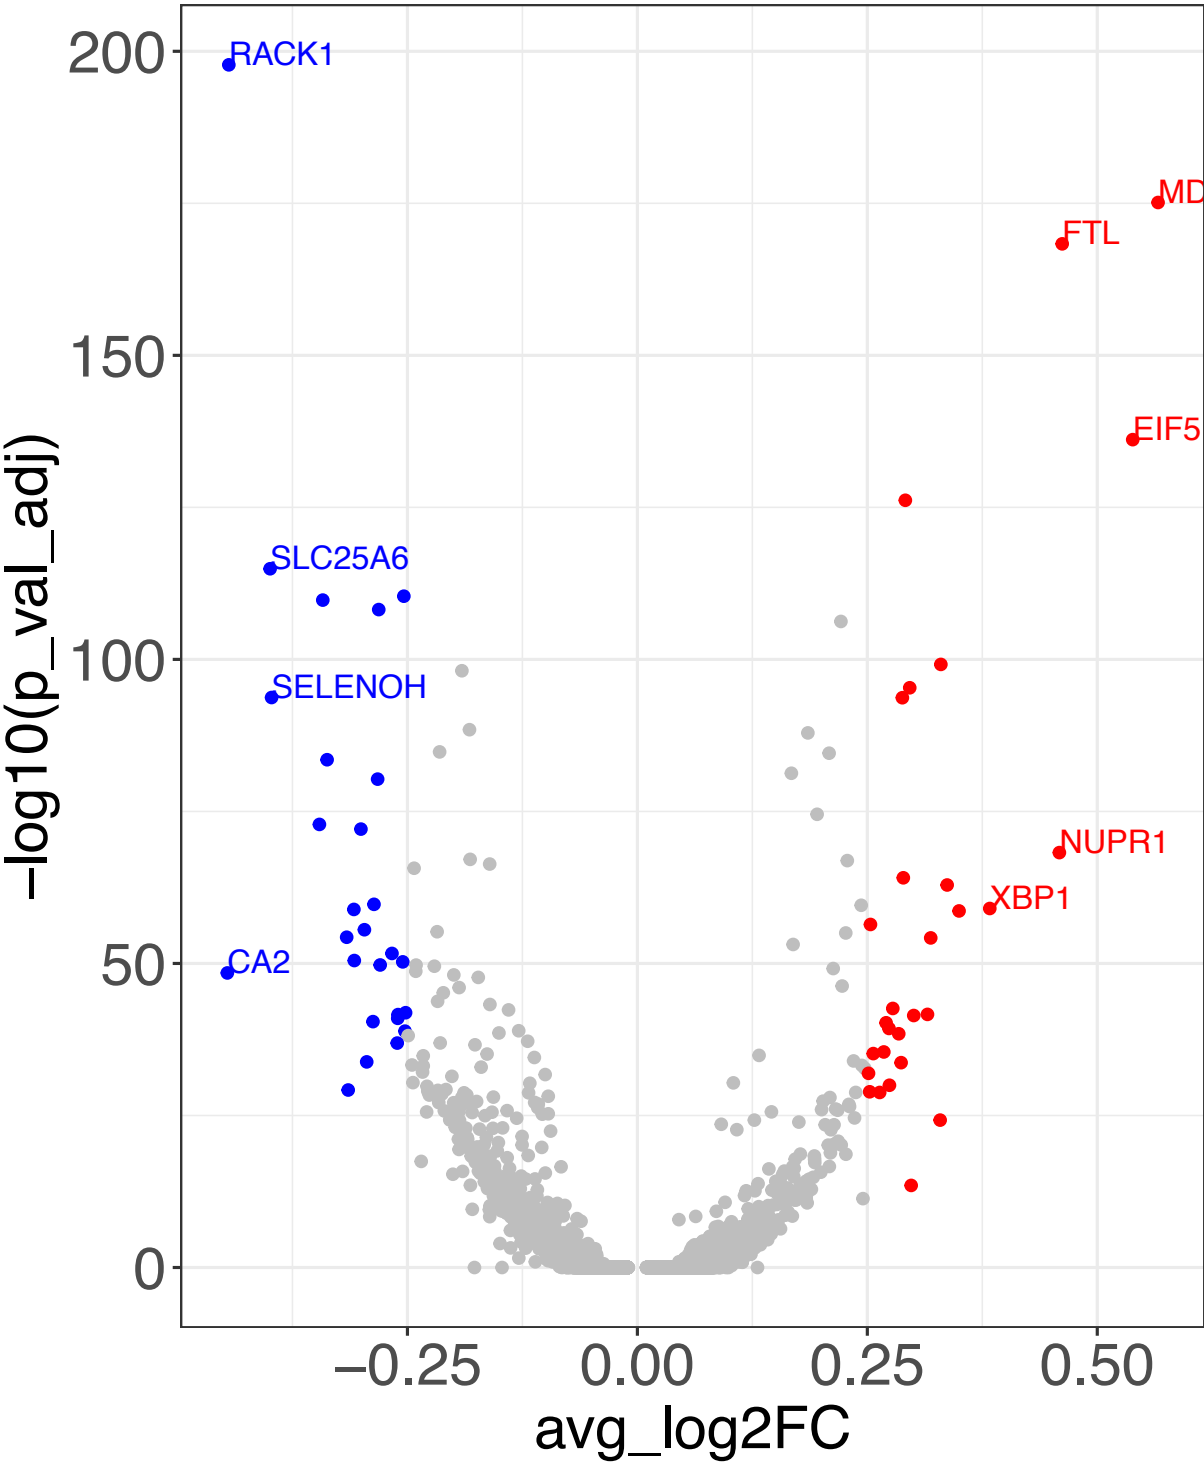

**Fig S7. UMAP plots colored by transcript isoform based cell clusters.**

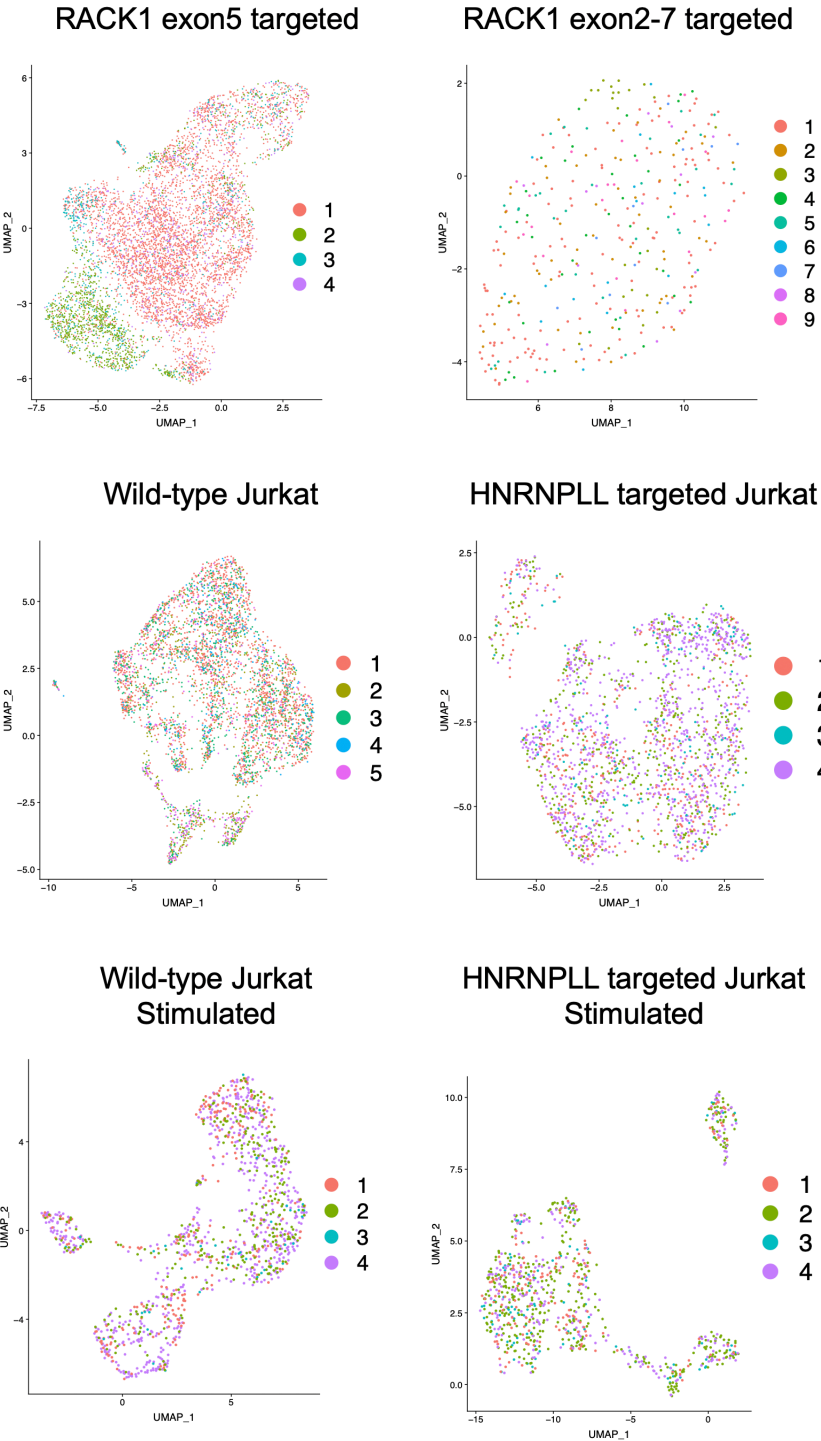



**Fig S8. Structure of major transcript isoforms of *PTPRC*.** Structures of major 5 transcripts isoform of *PTPRC*. Exon3 to 7 are highlighted.

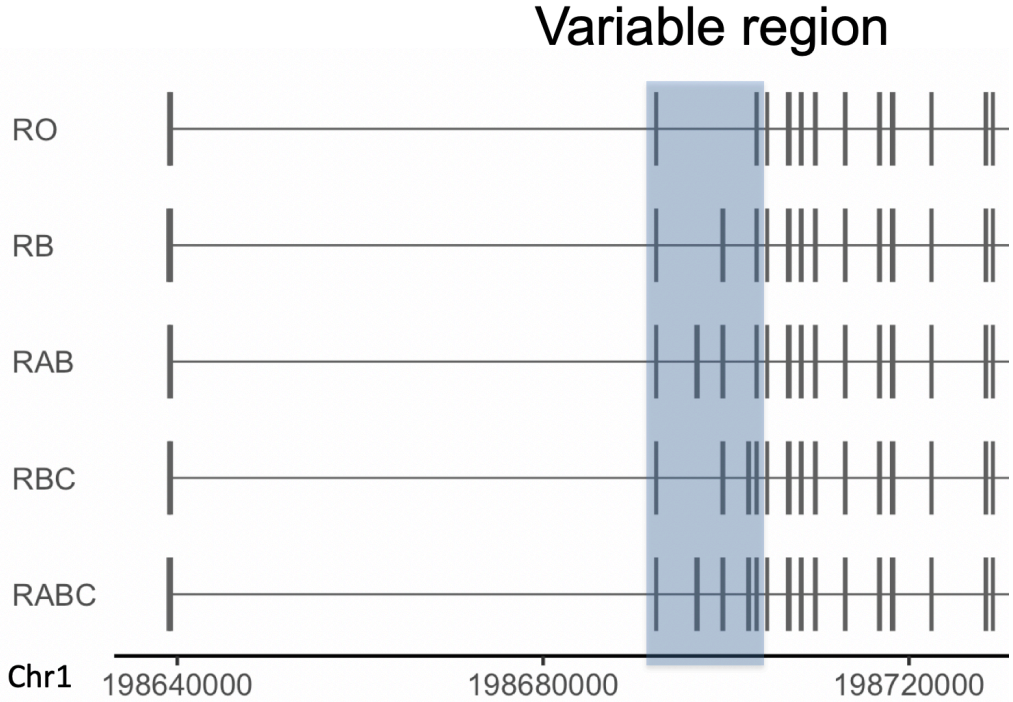

**Fig S9. Validation of gRNA identified by short-read sequencing and its consequential CRISPR editing by long-read sequencing per individual cell.** (a) Scheme of the experiment.

Ad/CB: Sequencing/10x adaptors and cell barcode sequences.

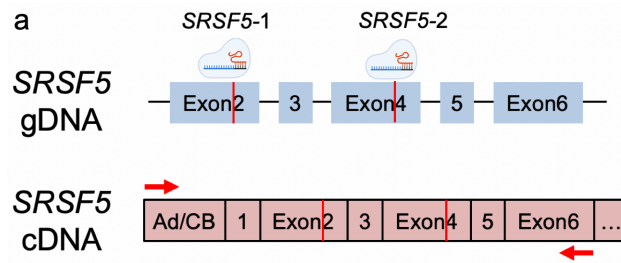

**Fig S10. Average short isoform proportion per targeted genes.** Heatmap showing the fold change of short *PTPRC* transcripts (RO and RB) proportion per cells having indicated gene targeting gRNA compared to nontarget cells.

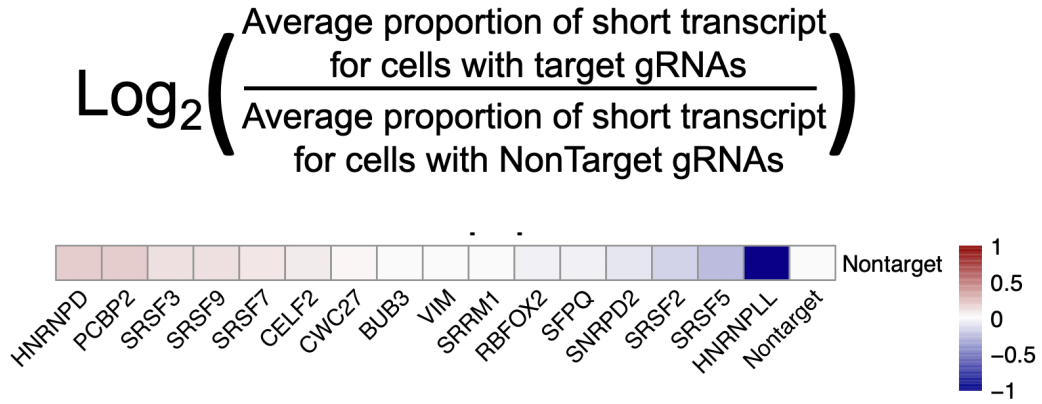

**Fig S11. Transcript isoform proportion for cells having nontarget gRNA sequence.**  
 Heatmap showing proportion of each transcript isoform (x-axis) with each cell (y-axis).

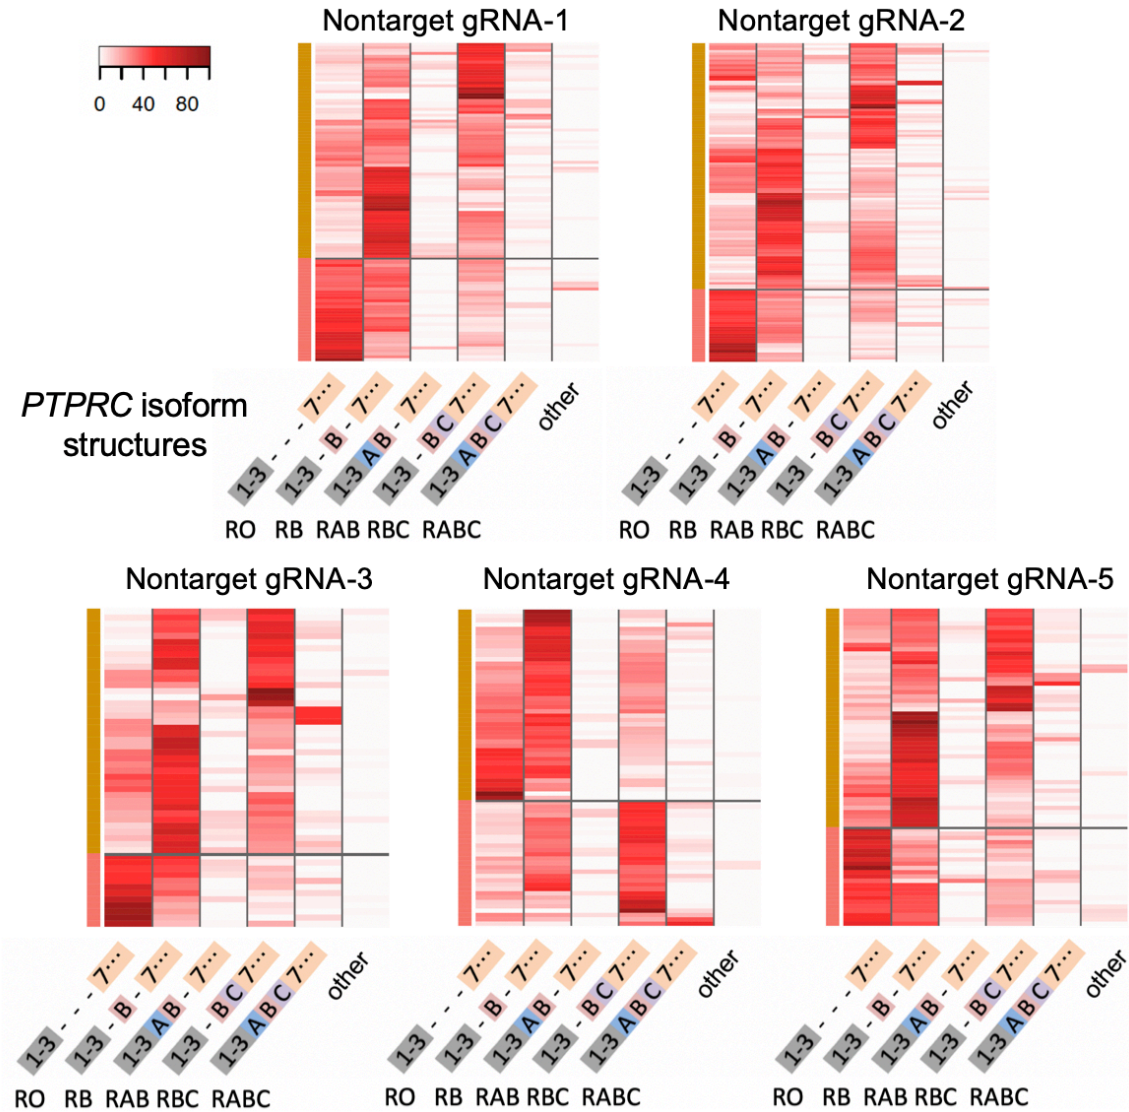

**Fig S12. Transcript isoform proportion for cells having *HNRNPLL* and *SRSF5* targeting gRNA sequence.** (a) Heatmap showing proportion of each transcript isoform (x-axis) with each cell (y-axis). (b, c) Boxplot showing the ratio of each of long *PTPRC* transcript isoform (RBC and RABC) for cells with the CRISPR target genes.

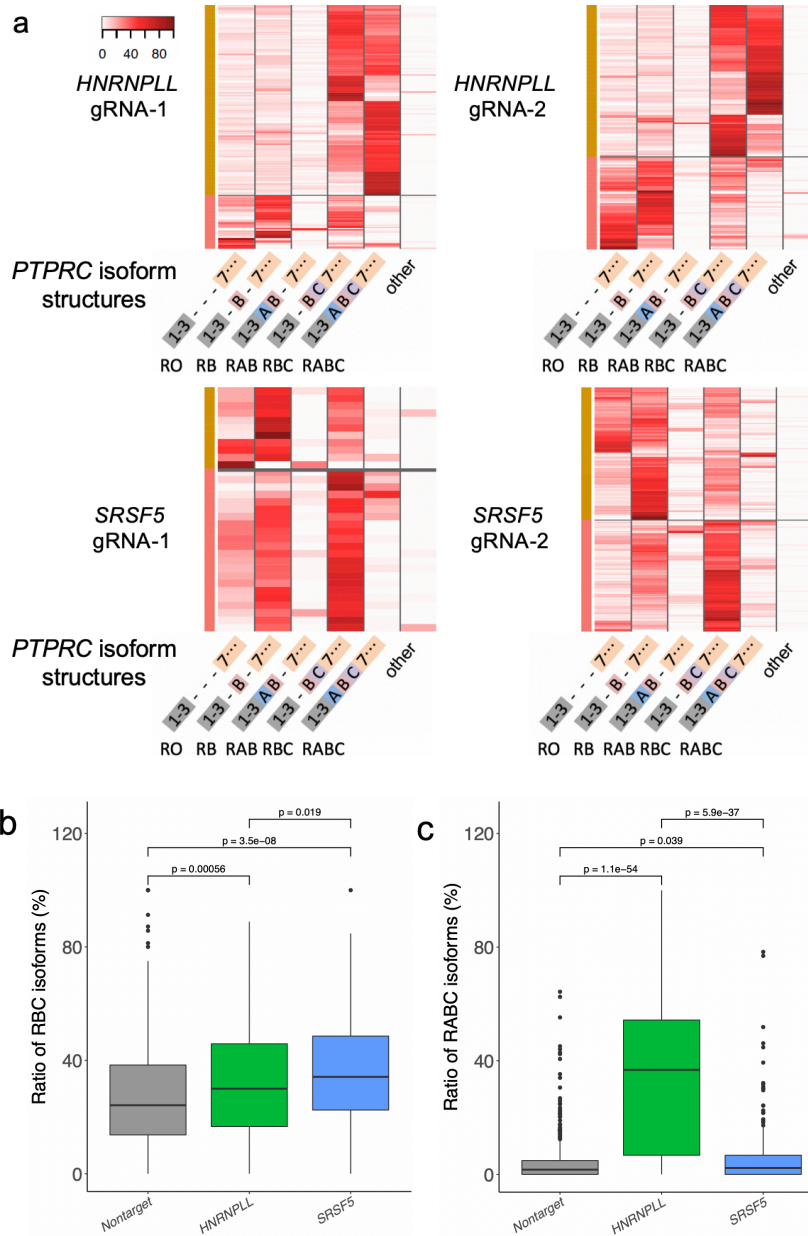

**Fig S13. Transcript isoform proportion for cells having *HNRNPD* and *PCBP2* gRNA sequence.** (a) Heatmap showing proportion of each transcript isoform (x-axis) with each cell (y-axis). (b, c) Boxplot showing the ratio of each of short *PTPRC* transcript isoform (RO and RB) for cells with the CRISPR targeted genes.

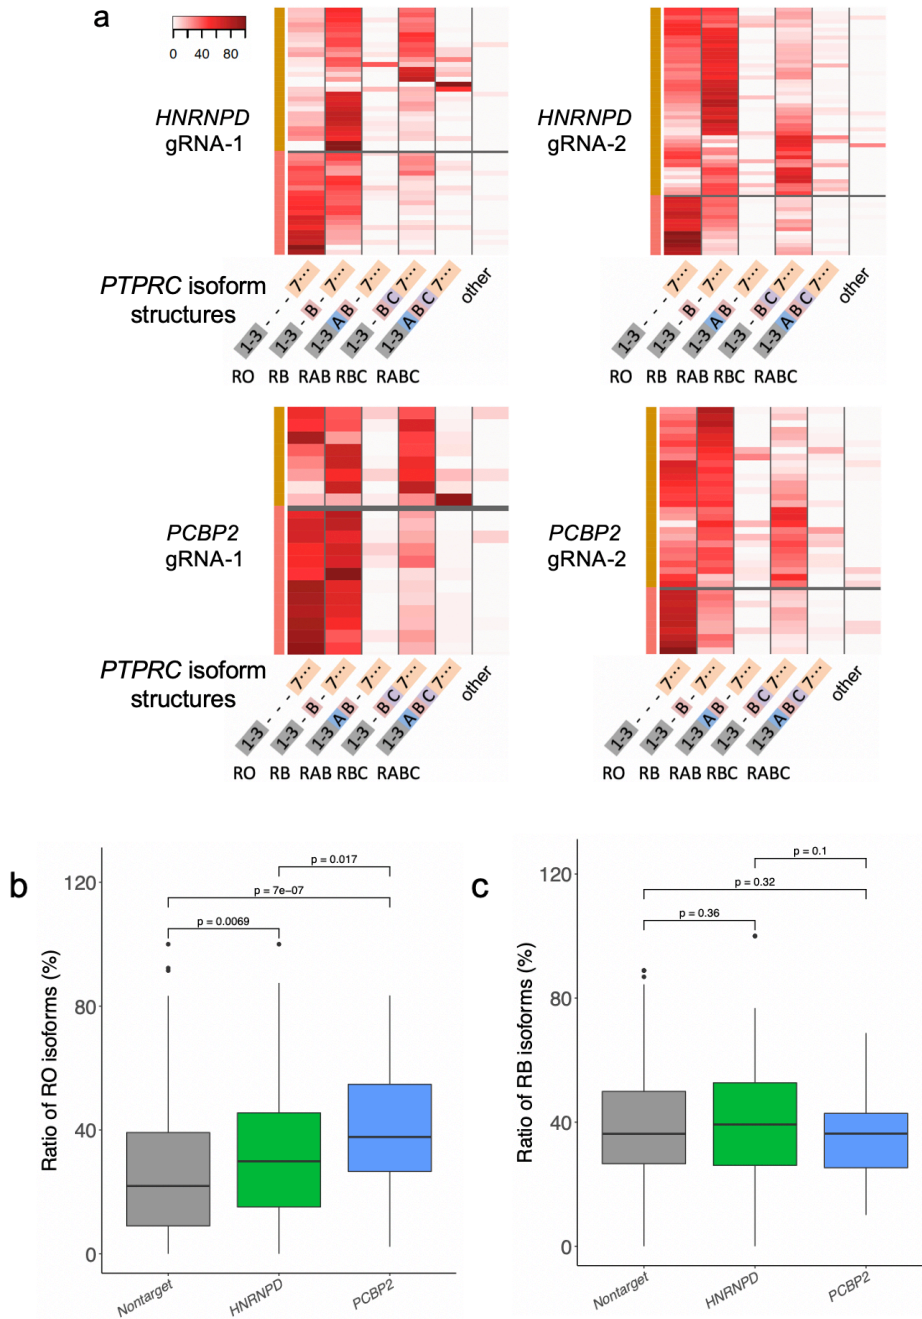

**Fig S14. Effect of various splicing factor KO on *MYL6* alternative splicing.** (a) Structure of major transcript isoforms of *MYL6*. (b) Boxplot showing the ratio of *MYL6* transcripts with exon6 skipping for cells with gRNAs targeting indicated genes.

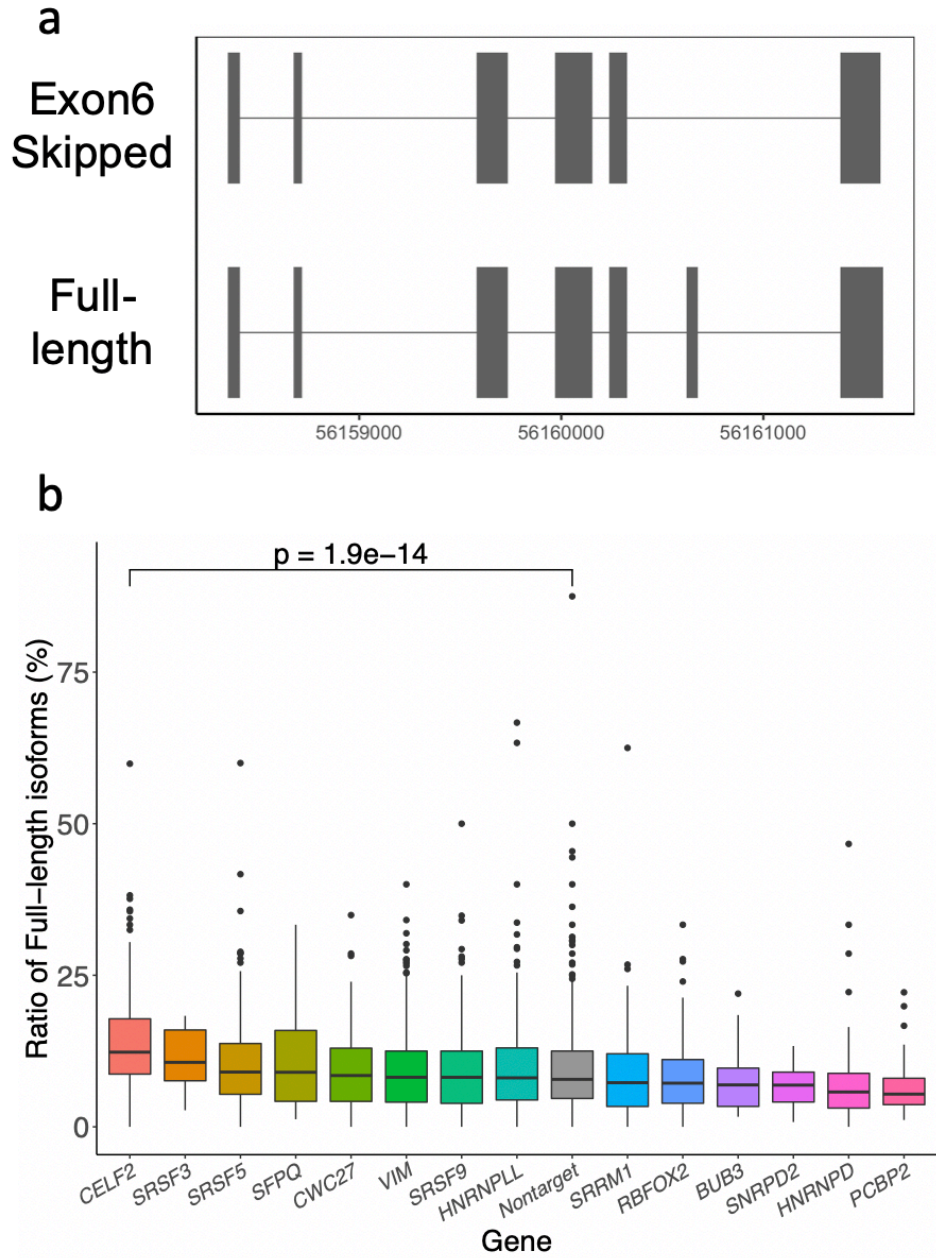

Supplement: 13059_2021_2554_MOESM1_ESM.pdf [file 13059_2021_2554_MOESM1_ESM.pdf]
